# Supplementary material
Source: PubMed Central journal article supplement (PMC9933175)
Supplement: ard-2021-221925supp001.pdf [file ard-2021-221925supp001.pdf]

## Supplemental Table.

| Treatment | Patient ID | Visit | Sample ID   | Outcome | # Clones | % Clonality |
|-----------|------------|-------|-------------|---------|----------|-------------|
| H5CT      | SCOT2      | D0    | SCOTlgH1-1  | R       | 2224     | 58.52       |
| H5CT      | SCOT2      | M26   | SCOTlgH1-2  | R       | 7511     | 71.9        |
| H5CT      | SCOT2      | M38   | SCOTlgH1-3  | R       | 8512     | 76.6        |
| H5CT      | SCOT2      | M48   | SCOTlgH1-4  | R       | 10300    | 74.63       |
| H5CT      | SCOT21     | D0    | SCOTlgH1-9  | NR      | 25351    | 88.06       |
| H5CT      | SCOT21     | M26   | SCOTlgH1-10 | NR      | 24346    | 86.88       |
| H5CT      | SCOT21     | M38   | SCOTlgH1-11 | NR      | 22390    | 90.15       |
| H5CT      | SCOT27     | D0    | SCOTlgH1-12 | R       | 10415    | 77.31       |
| H5CT      | SCOT27     | M26   | SCOTlgH1-13 | R       | 2020     | 76.94       |
| H5CT      | SCOT27     | M38   | SCOTlgH1-14 | R       | 13277    | 72.13       |
| H5CT      | SCOT27     | M48   | SCOTlgH1-15 | R       | 16158    | 71.11       |
| H5CT      | SCOT3      | D0    | SCOTlgH1-5  | NR      | 275      | 94.1        |
| H5CT      | SCOT32     | D0    | SCOTlgH3-1  | NR      | 5289     | 95.69       |
| H5CT      | SCOT32     | M26   | SCOTlgH3-2  | NR      | 13591    | 88.56       |
| H5CT      | SCOT33     | D0    | SCOTlgH3-3  | R       | 2963     | 69.25       |
| H5CT      | SCOT33     | M38   | SCOTlgH3-4  | R       | 10624    | 69.01       |
| H5CT      | SCOT33     | M48   | SCOTlgH3-5  | R       | 12450    | 72.1        |
| H5CT      | SCOT37     | D0    | SCOTlgH3-6  | NR      | 7986     | 73.67       |
| H5CT      | SCOT42     | D0    | SCOTlgH3-8  | R       | 8599     | 90.71       |
| H5CT      | SCOT42     | M26   | SCOTlgH3-9  | R       | 7110     | 88.69       |
| H5CT      | SCOT42     | M48   | SCOTlgH3-10 | R       | 4070     | 76.53       |
| H5CT      | SCOT45     | D0    | SCOTlgH3-11 | R       | 8283     | 91.01       |
| H5CT      | SCOT45     | M38   | SCOTlgH3-12 | R       | 10716    | 89.48       |
| H5CT      | SCOT45     | M48   | SCOTlgH3-13 | R       | 14941    | 83.35       |
| H5CT      | SCOT48     | D0    | SCOTlgH3-14 | NR      | 5737     | 85.75       |
| H5CT      | SCOT48     | M26   | SCOTlgH3-15 | NR      | 5867     | 74.09       |
| H5CT      | SCOT48     | M38   | SCOTlgH3-16 | NR      | 8231     | 85.42       |
| H5CT      | SCOT48     | M48   | SCOTlgH3-17 | NR      | 11590    | 74.93       |
| H5CT      | SCOT51     | D0    | SCOTlgH2-1  | NR      | 3094     | 68.61       |
| H5CT      | SCOT53     | D0    | SCOTlgH2-3  | NR      | 3711     | 66.59       |
| H5CT      | SCOT53     | M26   | SCOTlgH2-4  | NR      | 22459    | 83.37       |
| H5CT      | SCOT53     | M38   | SCOTlgH2-5  | NR      | 13408    | 81.21       |
| H5CT      | SCOT58     | D0    | SCOTlgH2-6  | NR      | 12760    | 93.56       |
| H5CT      | SCOT71     | M38   | SCOTlgH2-9  | NR      | 12691    | 90.16       |
| H5CT      | SCOT71     | M48   | SCOTlgH2-10 | NR      | 9479     | 81.27       |
| H5CT      | SCOT74     | D0    | SCOTlgH2-11 | R       | 9624     | 89.75       |
| H5CT      | SCOT74     | M26   | SCOTlgH2-12 | R       | 16070    | 92.38       |
| H5CT      | SCOT74     | M38   | SCOTlgH2-13 | R       | 15959    | 91.44       |
| H5CT      | SCOT74     | M48   | SCOTlgH2-14 | R       | 12821    | 89.42       |
| CYC       | SCOT12     | D0    | SCOTlgH1-25 | NR      | 8248     | 87.55       |
| CYC       | SCOT18     | D0    | SCOTlgH1-27 | NR      | 4524     | 92.88       |
| CYC       | SCOT25     | D0    | SCOTlgH1-29 | NR      | 6500     | 97.14       |
| CYC       | SCOT25     | M26   | SCOTlgH1-30 | NR      | 3494     | 95.82       |
| CYC       | SCOT25     | M38   | SCOTlgH1-31 | NR      | 935      | 91.04       |
| CYC       | SCOT25     | M48   | SCOTlgH1-32 | NR      | 2508     | 90.98       |
| CYC       | SCOT26     | D0    | SCOTlgH2-15 | NR      | 4442     | 69.15       |
| CYC       | SCOT26     | M26   | SCOTlgH2-16 | NR      | 12044    | 71.11       |
| CYC       | SCOT41     | D0    | SCOTlgH2-17 | R       | 9095     | 97.39       |
| CYC       | SCOT41     | M26   | SCOTlgH2-18 | R       | 5471     | 86.73       |
| CYC       | SCOT41     | M38   | SCOTlgH2-19 | R       | 5236     | 80.1        |
| CYC       | SCOT41     | M48   | SCOTlgH2-20 | R       | 6914     | 84.36       |
| CYC       | SCOT43     | D0    | SCOTlgH2-21 | NR      | 6920     | 81.4        |
| CYC       | SCOT43     | M26   | SCOTlgH2-22 | NR      | 7067     | 93.47       |
| CYC       | SCOT43     | M38   | SCOTlgH2-23 | NR      | 241      | 95.78       |
| CYC       | SCOT47     | D0    | SCOTlgH3-26 | NR      | 6992     | 76.56       |
| CYC       | SCOT47     | M26   | SCOTlgH3-27 | NR      | 4609     | 61.15       |
| CYC       | SCOT47     | M38   | SCOTlgH3-28 | NR      | 5586     | 73.27       |
| CYC       | SCOT5      | D0    | SCOTlgH1-16 | R       | 4943     | 80.9        |
| CYC       | SCOT5      | M26   | SCOTlgH1-17 | R       | 6220     | 81.54       |
| CYC       | SCOT5      | M38   | SCOTlgH1-18 | R       | 3117     | 63.13       |
| CYC       | SCOT50     | M26   | SCOTlgH2-27 | NR      | 7998     | 81.9        |
| CYC       | SCOT50     | M38   | SCOTlgH2-25 | NR      | 10580    | 73.15       |
| CYC       | SCOT50     | M48   | SCOTlgH2-26 | NR      | 8481     | 69.84       |
| CYC       | SCOT63     | D0    | SCOTlgH2-28 | NR      | 1921     | 90.64       |
| CYC       | SCOT63     | M26   | SCOTlgH2-29 | NR      | 1689     | 97.33       |
| CYC       | SCOT63     | M48   | SCOTlgH2-30 | NR      | 1041     | 80          |
| CYC       | SCOT64     | D0    | SCOTlgH3-20 | NR      | 5239     | 33.5        |
| CYC       | SCOT67     | M26   | SCOTlgH3-21 | NR      | 13269    | 82.88       |
| CYC       | SCOT67     | M38   | SCOTlgH3-22 | NR      | 10794    | 72.63       |
| CYC       | SCOT67     | M48   | SCOTlgH3-23 | NR      | 24974    | 81.69       |
| CYC       | SCOT70     | M26   | SCOTlgH3-25 | NR      | 5607     | 84.13       |
| CYC       | SCOT73     | D0    | SCOTlgH3-29 | R       | 5909     | 63.58       |
| CYC       | SCOT73     | M26   | SCOTlgH3-30 | R       | 5033     | 61.41       |
| CYC       | SCOT73     | M38   | SCOTlgH3-31 | R       | 4954     | 53.49       |
| CYC       | SCOT73     | M48   | SCOTlgH3-32 | R       | 3649     | 54.46       |
| CYC       | SCOT8      | D0    | SCOTlgH1-19 | NR      | 4227     | 92.72       |
| CYC       | SCOT9      | D0    | SCOTlgH1-21 | R       | 4094     | 80.55       |
| CYC       | SCOT9      | M26   | SCOTlgH1-22 | R       | 7137     | 79.94       |
| CYC       | SCOT9      | M38   | SCOTlgH1-23 | R       | 7195     | 85.11       |
| CYC       | SCOT9      | M48   | SCOTlgH1-24 | R       | 7878     | 84.19       |
| Healthy   | HC1        | D0    | SCOTlgH1-33 | Healthy | 4974     | 73.98       |
| Healthy   | HC10       | D0    | SCOTlgH2-35 | Healthy | 9575     | 91.43       |
| Healthy   | HC11       | D0    | SCOTlgH2-36 | Healthy | 10150    | 87.11       |
| Healthy   | HC12       | D0    | SCOTlgH3-33 | Healthy | 7636     | 86.59       |
| Healthy   | HC13       | D0    | SCOTlgH3-34 | Healthy | 1114     | 59.41       |
| Healthy   | HC14       | D0    | SCOTlgH3-35 | Healthy | 5716     | 65.29       |
| Healthy   | HC15       | D0    | SCOTlgH3-36 | Healthy | 10006    | 88.12       |
| Healthy   | HC2        | D0    | SCOTlgH1-34 | Healthy | 2386     | 74.16       |
| Healthy   | HC3        | D0    | SCOTlgH1-35 | Healthy | 4605     | 61.81       |
| Healthy   | HC4        | D0    | SCOTlgH1-36 | Healthy | 9274     | 69.76       |
| Healthy   | HC5        | D0    | SCOTlgH1-37 | Healthy | 7264     | 88.3        |
| Healthy   | HC6        | D0    | SCOTlgH2-31 | Healthy | 3482     | 82.28       |
| Healthy   | HC7        | D0    | SCOTlgH2-32 | Healthy | 4040     | 68.67       |
| Healthy   | HC8        | D0    | SCOTlgH2-33 | Healthy | 5759     | 82.18       |
| Healthy   | HC9        | D0    | SCOTlgH2-34 | Healthy | 3857     | 73.51       |

# Clones represents the number of distinct Ig BCR heavy chain VDJ CDR3 sequences obtained.

% Clonality represents the percent of sequences with matched V-J genes and >60% CDR3 homology.
