# Supplementary material
Source: PubMed Central journal article supplement (PMC9933175)

## Supplemental Figure 1

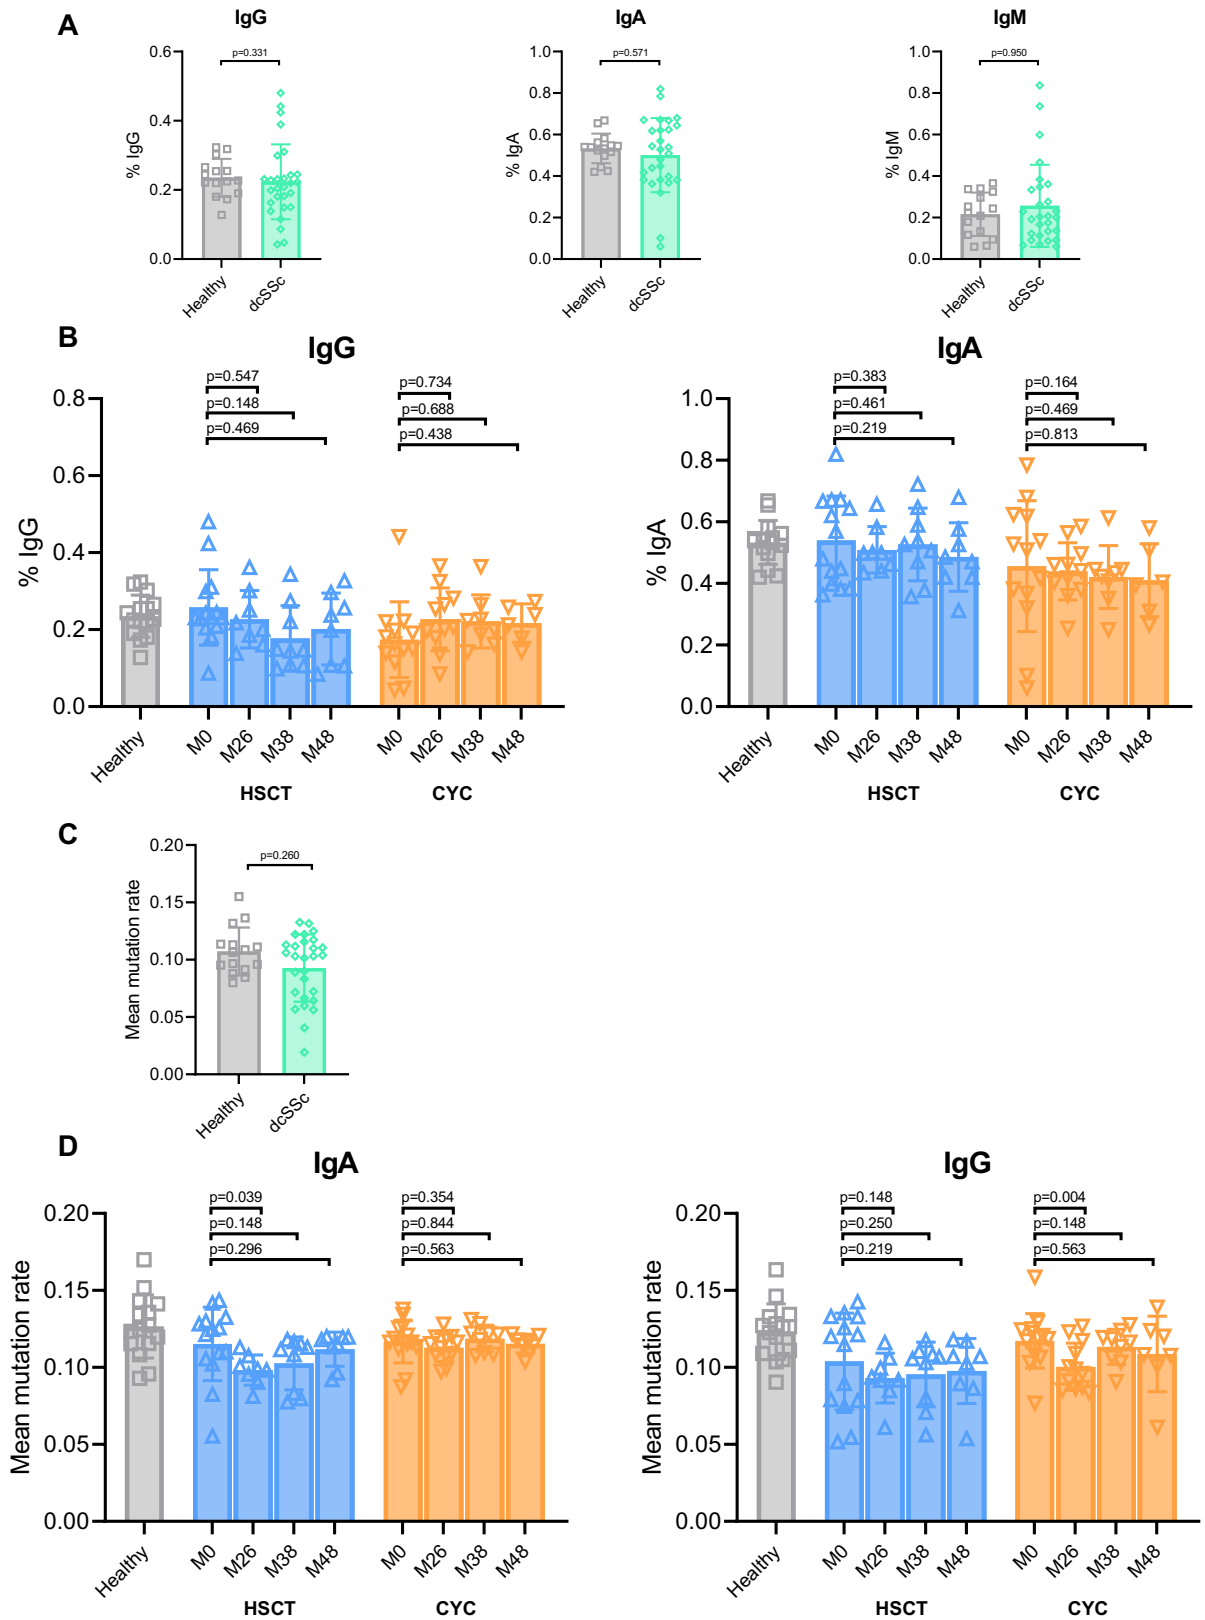

## Supplemental Figure 2

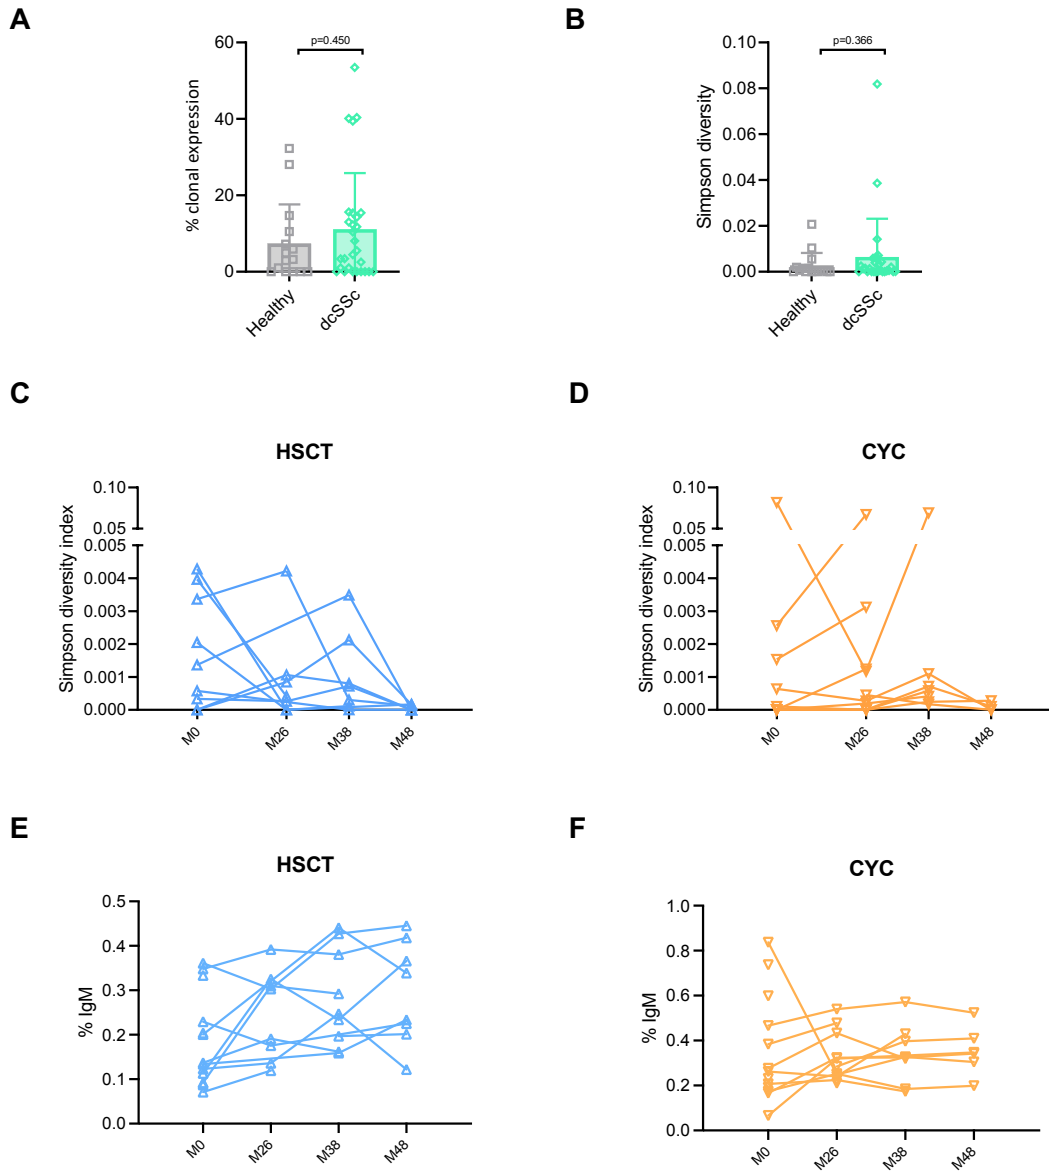

## Supplemental Figure 3

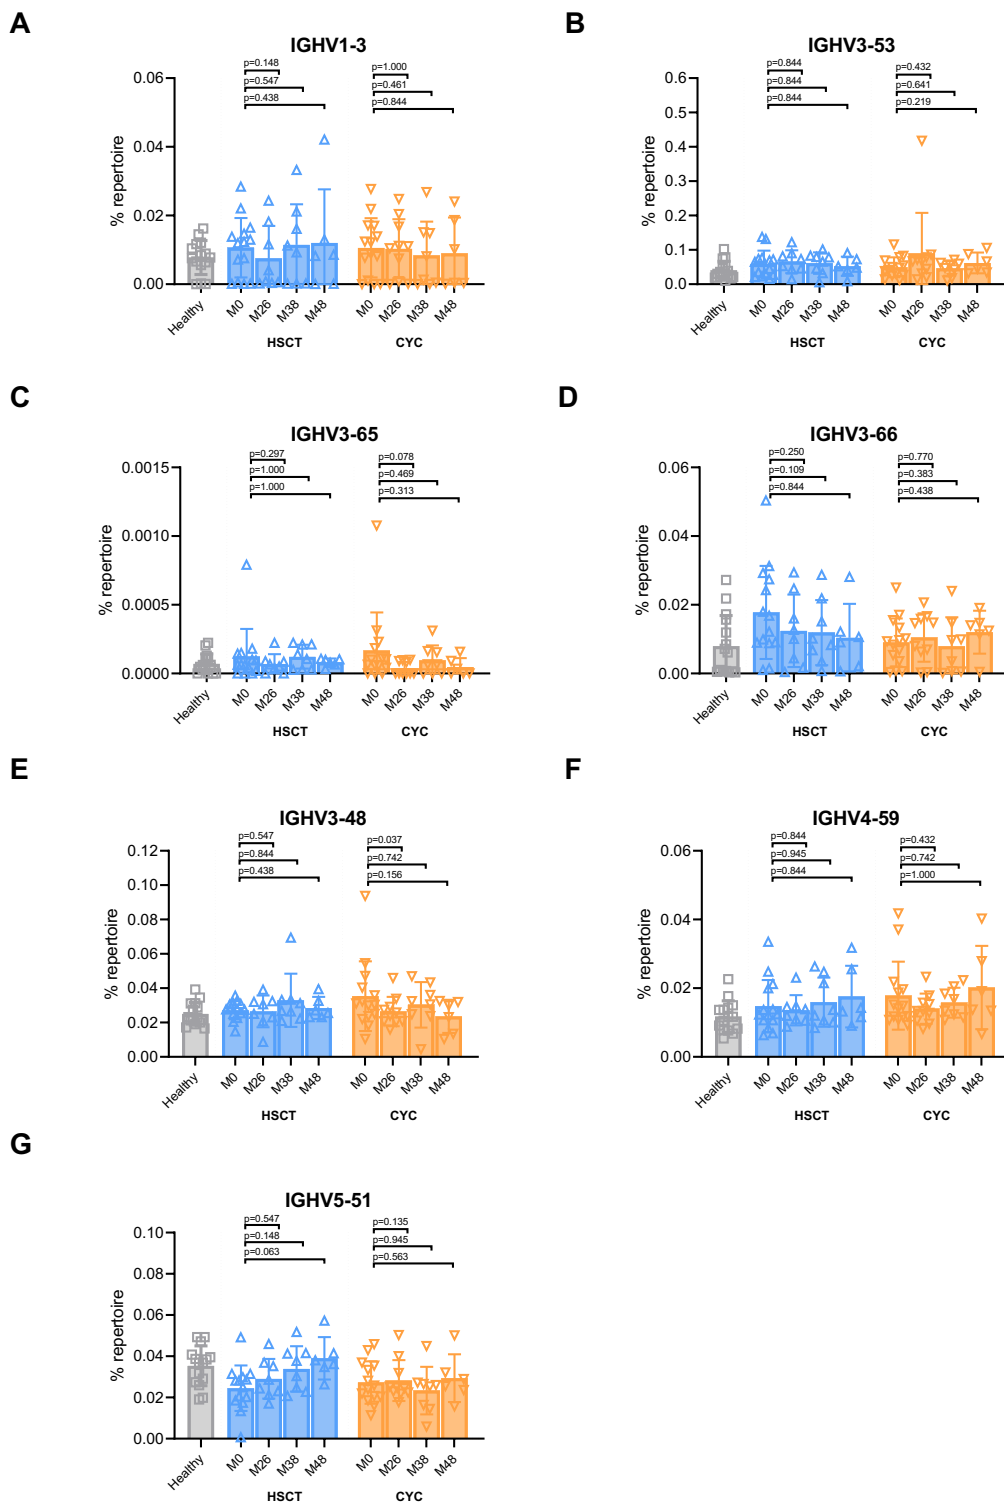

Supplement: ard-2021-221925supp002.pdf [file ard-2021-221925supp002.pdf]
